# Supplementary material for: Molecular organization and dynamics of the fusion protein Gc at the hantavirus surface
Source: eLife journal article supplement (doi:10.7554/elife.46028), 2019-06-10
Supplement: supp [file elife-46028-supp-v1.zip]

Archive with 11 entries (11 files):
- elife_poa_e46028_Figure_3_figure_supplement_2.tif
- elife_poa_e46028_Figure_4_source_data_1.xlsx
- elife_poa_e46028_Figure_2_source_data_1.xlsx
- elife_poa_e46028_Figure_3_figure_supplement_1.tif
- elife_poa_e46028_Figure_5_figure_supplement_1.tif
- elife_poa_e46028_Figure_4_figure_supplement_1.tif
- elife_poa_e46028_Figure_1_figure_supplement_1.tif
- elife_poa_e46028_Figure_3_source_data_1.xlsx
- elife_poa_e46028_Figure_5_source_data_1.xlsx
- elife_poa_e46028_Figure_6_source_data_1.xlsx
- elife_poa_e46028_Transparent_Reporting_File.pdf
