# Supplementary material for: Molecular organization and dynamics of the fusion protein Gc at the hantavirus surface
Source: eLife journal article supplement (doi:10.7554/elife.46028), 2019-06-10
Supplement: supp [file elife-46028-supp-v1.zip › elife_poa_e46028_Figure_2_source_data_1.xlsx]

## Sheet: Figure 2C
	WT
	Temperature (°C)	BN-PAGE Gn/Gc dissociation (%)	s.d.		Less exposure					More exposure
	20	0	0
	30	0	0
	35	6.1425	7.0985
	37	39.3563	4.7175
	40	78	7.2014
	50	98.3867	2.7944
	G187C
	Temperature (°C)	BN-PAGE Gn/Gc dissociation (%)	s.d.
	20	0	0
	30	5	1
	40	6.5	6
	45	9.85	8
	50	82.84	5
	55	95.7	2
	60	100	3.742
