# Supplementary material for: Molecular organization and dynamics of the fusion protein Gc at the hantavirus surface
Source: eLife journal article supplement (doi:10.7554/elife.46028), 2019-06-10
Supplement: supp [file elife-46028-supp-v1.zip › elife_poa_e46028_Figure_3_source_data_1.xlsx]

## Sheet: Figure 3A
		VLP release (% WT )	s.d.
	wt	100	0
	D28A	27.0593	11.2432
	E26Q	94.5734	11.447
	R301Q	57.3477	17.4763
	H303F	97.0803	29.0871
	E26K	10.4813	4.42246
	D28K	28.9653	28.9653
	R301E	6.90732	6.90732
	H303E	2.56065	2.56065

## Sheet: Figure 3B
	WT
	Temperature (°C)	BN-PAGE Gn/Gc dissociation (%)	s.d.
	20	0	0
	30	0	0
	35	6.1425	7.0985
	37	39.3563	4.7175
	40	78	7.2014
	50	98.3867	2.7944
	E26Q
	Temperature (°C)	BN-PAGE Gn/Gc dissociation (%)	s.d.
	20	24.8998	2.55008
	30	25.3118	3.84408
	35	53.7167	2.14167
	37	77.081	2.45952
	40	90.9325	0.533727
	50	100	0
	D28A
	Temperature (°C)	BN-PAGE Gn/Gc dissociation (%)	s.d.
	20	6.78	4
	30	22.6	8
	35	58.1	12
	40	100	0
	50	100	0
	H303F
	Temperature (°C)	BN-PAGE Gn/Gc dissociation (%)	s.d.
	20	22	15
	30	77.4	16
	35	94.88	12
	40	100	2.1213
	50	100	0
	R301Q
	Temperature (°C)	BN-PAGE Gn/Gc dissociation (%)	s.d.
	20	0	0
	30	36.8	4
	35	66	9
	40	100	0
	50	100	0
