# Supplementary material for: Molecular organization and dynamics of the fusion protein Gc at the hantavirus surface
Source: eLife journal article supplement (doi:10.7554/elife.46028), 2019-06-10
Supplement: supp [file elife-46028-supp-v1.zip › elife_poa_e46028_Figure_4_source_data_1.xlsx]

## Sheet: Fig 4A
		MEM pH 5,5	s.d.	MEM pH 4,5	s.d.	MEM pH 7,4	s.d.
	wt	0.866	0.06	0.85	0.0547	0.001	0.0002
	E26Q	0.42	0.0555	0.41	0.0655	0.01	0.03
	E26K	0.051	0.0507	0.04	0.0547	0.012	0.0002
	D28A	0.0428	0.0201	0.0213	0.0301	0.0375	0.027
	D28K	0.003	0.001	0.003	0.0077279	0.09	0.015
	R301Q	0.033	0.08	0.02	0.0555	0.04	0.03
	R301E	0.05	0.066	0.04	0.0555	0.025	0.011
	H303F	0.001	0.05	0.0065359	0.0092432	0.0313	0.0221
	H303E	0.03	0.04	0.05	0.0376	0.03	0.017
	H303C	0.081	0.01	0.0721	0.0835	0.0287	0.0206
	G187C	0.004	0.05	0.03	0.033	0.06	0.01

## Sheet: Fig 4B
	pH	wt	s.d.	E26Q	s.d.
	5.5	100	10.035	92.6498	14.5585
	5.8	94.1137	7.47	100.003	24.9574
	6	88.788	7.845	92.6498	14.5585
	6.2	44.8879	10.59	96.7052	5.4032
	6.4	5.4325	4.71	0	0

## Sheet: Fig 4C
	pH	wt	s.d.	H303F	s.d.	D28A	s.d.
	5	100	0	100	0	100	0
	5.5	88	15	55	4	99	2
	5.8	55	6.5	31	3.8	80	1
	6	37	4	0	0	58.1331	5
	6.2	5	6	0	0	12.1789	3
	6.5					3.4821	3.2
