# Supplementary material for: Molecular organization and dynamics of the fusion protein Gc at the hantavirus surface
Source: eLife journal article supplement (doi:10.7554/elife.46028), 2019-06-10
Supplement: supp [file elife-46028-supp-v1.zip › elife_poa_e46028_Figure_5_source_data_1.xlsx]

## Sheet: Figure 5C
		wt				wt
		Temperature (°C)	VLP-Liposome coflotation (%)	s.d.		Temperature (°C)	BN-PAGE Gn/Gc dissociation (%)	s.d.
		20	4.1892	0		20	0	0
		30	20.3826	0		30	0	0
		35	35.3265	6.1425		35	6.1425	7.0985
		37	40.0531	39.3563		37	39.3563	4.7175
		40	79.6756	78		40	78	7.2014
		50	97.2547	98.3867		50	98.3867	2.7944

## Sheet: Figure 5E
	wt				G187C
	Temperature (°C)	VLP-Liposome coflotation (%)	s.d.		Temperature (°C)	VLP-Liposome coflotation (%)	s.d.
	20	4.1892	0		20	0	0
	30	20.3826	0		30	6.0147	5
	35	35.3265	6.1425		37	65	0
	37	40.0531	39.3563		45	79.3739	3
	40	79.6756	78		50	68.6047	6.0844
	50	97.2547	98.3867		55	74.6424	11
					60	78.2343	6
