# Supplementary material for: Molecular organization and dynamics of the fusion protein Gc at the hantavirus surface
Source: eLife journal article supplement (doi:10.7554/elife.46028), 2019-06-10
Supplement: supp [file elife-46028-supp-v1.zip › elife_poa_e46028_Figure_6_source_data_1.xlsx]

## Sheet: Figure 6A
	ANDV
	Temperature (°C)	20	37	40	50	56
	Infection (%)	56.4	44	37	15.1	0.81
		62.7	33.3	30.7	15	0.33
		59.1	54.2	35.3	18.05	0.21
	Mean	59.4	43.8333	34.3333	16.05	0.45
	s.d.	2.5807	8.5332	2.66124	1.4148	0.25923

## Sheet: Figure 6B
	ANDV
	Temperature (°C)	20	37	40	50	56
	Infection (%)	49.5	55.6	51	46	0.83
		56.1	66.4	59.8	55.8	1.07
		71.5	68.4	58.8	57.9	0.22
	Mean	59.0333	63.4667	56.5333	53.2333	0.706667
	s.d.	9.21786	5.62218	3.9339	5.18609	0.357802

## Sheet: Figure 6C
		Lipid mixing (%)
		Temperature (°C)	ANDV	ANDV 50°C	ANDV 50°C + 1h 4°C
		0.5	0.5651	-0.0136	0.5531
		1.5	0.6188	-0.0212	1.0043
		2.5	0.5426	-0.0228	0.6998
		3.5	0.7499	-0.0278	0.5621
		4.5	0.7248	0.00876	0.8166
		5.5	1.021	-0.0471	0.8859
		6.5	0.9916	-0.0301	1.0066
		7.5	0.8538	-0.0128	1.1346
		8.5	0.85	-0.0336	1.3773
		9.5	0.7988	-0.0235	1.3677
		10.5	1.1087	-0.05	1.4971
		11.5	1.2323	-0.0572	1.2807
		12.5	1.6674	-0.0671	1.3354
		13.5	1.5366	-0.043	1.3808
		14.5	1.8033	-0.0656	1.037
		15.5	1.9823	-0.0719	1.0805
		16.5	2.09	-0.0487	1.2041
		17.5	1.6341	-0.0839	1.865
		18.5	1.8751	-0.0696	1.7258
		19.5	2.1778	-0.1022	1.7803
		20.5	2.055	-0.102	1.2319
		21.5	1.994	-0.1033	1.5733
		22.5	1.9697	-0.1271	1.2333
		23.5	2.1446	-0.1	1.6065
		24.5	1.9438	-0.1231	1.9825
		25.5	2.3328	-0.0743	1.8409
		26.5	2.377	-0.1378	1.6381
		27.5	2.3722	-0.0945	2.3987
		28.5	2.6026	-0.1226	1.8473
		29.5	2.4613	-0.1186	1.9512
		30.5	2.2305	-0.1178	2.0161
		31.5	2.6321	-0.156	2.112
		32.5	2.4569	-0.1454	2.4829
		33.5	2.3208	-0.1538	2.2891
		34.5	2.8672	-0.1429	2.3409
		35.5	2.5059	-0.1322	2.3035
		36.5	2.6079	-0.1381	2.4935
		37.5	2.5677	-0.1488	2.423
		38.5	3.0392	-0.1535	2.5269
		39.5	3.1206	-0.1739	2.3466
		40.5	2.9836	-0.1499	2.975
		41.5	2.9268	-0.1841	1.9856
		42.5	2.925	-0.1951	2.3701
		43.5	2.8981	-0.1884	2.4913
		44.5	3.2476	-0.1807	2.7593
		45.5	2.9291	-0.2137	2.5302
		46.5	3.4356	-0.1708	2.2807
		47.5	3.0984	-0.1765	2.7021
		48.5	3.0902	-0.1738	2.4683
		49.5	3.3478	-0.1727	2.3503
		50.5	3.4736	-0.2249	2.4459
		51.5	3.0587	-0.2144	2.3125
		52.5	3.1758	-0.2033	2.5736
		53.5	3.2416	-0.2227	2.317
		54.5	3.2609	-0.2092	2.5878
		55.5	3.7836	-0.2201	2.7775
		56.5	3.1037	-0.2383	2.4625
		57.5	3.4592	-0.2212	2.7831
		58.5	3.6787	-0.2296	2.4793
		59.5	3.4731	-0.2282	2.9046
		60.5	3.3332	-0.2528	2.4832
		61.5	3.4684	-0.2499	2.735
		62.5	3.5447	-0.2564	2.7193
		63.5	3.498	-0.2618	2.6724
		64.5	3.4087	-0.2347	2.9365
		65.5	3.862	-0.2809	2.9713
		66.5	3.5226	-0.2711	2.9171
		67.5	3.6996	-0.2833	2.7593
		68.5	3.8049	-0.2858	2.8359
		69.5	3.7732	-0.2633	2.9666
		70.5	3.7227	-0.3135	2.7433
		71.5	3.7317	-0.3112	3.1794
		72.5	3.6242	-0.3209	2.983
		73.5	3.8647	-0.3188	3.2115
		74.5	3.932	-0.3029	3.0297
		75.5	3.8516	-0.3443	2.9092
		76.5	3.8525	-0.3165	2.8539
		77.5	3.7288	-0.3485	2.8972
		78.5	3.8824	-0.3548	3.1219
		79.5	4.1103	-0.3562	3.0439
		80.5	3.6865	-0.3369	2.9093
		81.5	3.7958	-0.373	3.1741
		82.5	3.6766	-0.3743	3.2612
		83.5	3.9363	-0.3692	3.1835
		84.5	3.6312	-0.3948	3.3833
		85.5	3.9388	-0.3939	3.7657
		86.5	3.97	-0.3837	3.1367
		87.5	3.7407	-0.3888	3.1276
		88.5	3.7884	-0.3764	3.2719
		89.5	4.0107	-0.3882	3.0887
		90.5	3.7387	-0.3811	3.0397
		91.5	3.9123	-0.3971	3.7039
		92.5	3.7172	-0.4052	3.6621
		93.5	4.1602	-0.434	3.2826
		94.5	4.0318	-0.4055	5.0536
		95.5	3.7409	-0.3808	3.9402
		96.5	3.9129	-0.3929	3.7823
		97.5	3.9151	-0.4163	4.0266
		98.5	3.9991	-0.4006	3.1966
		99.5	4.1762	-0.4094	3.0847
		100.5	3.9181	-0.3862	3.2253

## Sheet: Figure 6D
	Lipid mixing (%)
	Temperature (°C)	HTNV	HTNV 50°C	HTNV 50°C + 1h 4°C
	0.5	-0.101	0.00031123	0
	1.5	0	0.0777	0.25
	2.5	0	0.0050301	0.5308
	3.5	0.5225	0.0188	0.6754
	4.5	0.6133	-0.0468	0.9608
	5.5	0.8552	0.0329	0.9156
	6.5	1.2328	-0.0186	1.0656
	7.5	1.5225	0.0065309	1.0821
	8.5	1.6544	0.0736	1.3779
	9.5	1.7502	0.032	1.0874
	10.5	1.9034	0.015	1.3541
	11.5	2.0446	-0.0158	1.3663
	12.5	2.1172	0.0942	1.5673
	13.5	2.1768	0.1327	1.267
	14.5	2.3072	0.1381	1.6602
	15.5	2.5895	0.1074	1.7817
	16.5	2.4907	0.0046871	1.7851
	17.5	2.551	0.0815	1.9892
	18.5	2.6062	0.1114	1.9857
	19.5	2.6251	0.0997	1.9489
	20.5	2.7417	0.0452	2.144
	21.5	2.835	0.1418	2.0865
	22.5	2.7614	0.1171	2.3905
	23.5	2.9464	0.0857	2.2362
	24.5	2.8652	0.0414	2.2319
	25.5	2.9189	0.1396	2.2548
	26.5	2.8817	0.0276	2.4423
	27.5	3.1179	0.0329	2.2631
	28.5	3.0485	0.1058	2.4271
	29.5	3.0754	0.0908	2.5255
	30.5	3.0596	0.1402	2.3191
	31.5	3.1758	0.0906	2.5633
	32.5	3.2222	0.0489	2.6363
	33.5	3.2256	0.0289	2.594
	34.5	3.201	0.06	2.6363
	35.5	3.2982	0.0617	2.9403
	36.5	3.363	-0.021	2.7473
	37.5	3.31	0.1122	2.7392
	38.5	3.4107	-0.043	2.6803
	39.5	3.3178	0.0579	2.9017
	40.5	3.3538	-0.0625	2.7203
	41.5	3.3946	-0.0619	2.8992
	42.5	3.3827	0.0107	2.8742
	43.5	3.4476	-0.0263	2.7998
	44.5	3.4332	0.1021	2.7335
	45.5	3.4068	-0.00018376	2.834
	46.5	3.5166	0.0651	2.8735
	47.5	3.5577	-0.0251	2.9993
	48.5	3.5251	0.1743	3.0169
	49.5	3.512	-0.0505	3.0336
	50.5	3.6137	0.0801	3.1478
	51.5	3.5165	0.1003	3.2042
	52.5	3.6037	-0.0224	3.1472
	53.5	3.6229	0.042	3.2315
	54.5	3.5955	0.0495	3.1058
	55.5	3.5758	-0.0692	3.1921
	56.5	3.6912	-0.0478	3.1252
	57.5	3.6531	-0.0837	3.2767
	58.5	3.6741	-0.1362	3.1789
	59.5	3.6831	-0.1651	3.3494
	60.5	3.5298	-0.114	3.4415
	61.5	3.6868	-0.1074	3.2572
	62.5	3.7134	-0.1105	3.3819
	63.5	3.7726	-0.0964	3.3235
	64.5	3.8532	-0.0398	3.3555
	65.5	3.7155	-0.1087	3.2475
	66.5	3.6566	-0.1291	3.3381
	67.5	3.757	-0.1399	3.3239
	68.5	3.7176	-0.1411	3.4085
	69.5	3.5984	-0.1076	3.1586
	70.5	3.8436	-0.2205	3.4943
	71.5	3.8375	-0.0504	3.3815
	72.5	3.905	-0.101	3.4199
	73.5	3.8934	-0.116	3.487
	74.5	3.7924	-0.1578	3.559
	75.5	3.8055	-0.1398	3.3141
	76.5	3.857	-0.2314	3.4622
	77.5	3.9864	-0.2181	3.4242
	78.5	3.9376	-0.2338	3.4102
	79.5	3.9708	-0.0935	3.5909
	80.5	3.8602	-0.2419	3.3629
	81.5	3.9923	-0.214	3.5035
	82.5	3.9506	-0.1073	3.6104
	83.5	3.9138	-0.1778	3.4672
	84.5	3.97	-0.1721	3.5322
	85.5	3.9589	-0.1361	3.6197
	86.5	3.9599	-0.2136	3.5779
	87.5	4.0315	-0.1808	3.7401
	88.5	4.0867	-0.1782	3.6361
	89.5	3.8976	-0.2143	3.533
	90.5	4.0551	-0.3211	3.487
	91.5	3.9508	-0.2972	3.5277
	92.5	3.912	-0.2717	3.6445
	93.5	3.8944	-0.2236	3.5338
	94.5	4.1045	-0.241	3.5828
	95.5	4.0636	-0.2176	3.6087
	96.5	3.968	-0.1165	3.424
	97.5	3.7605	-0.2573	3.5494
	98.5	4.0393	-0.3087	3.7681
	99.5	3.9973	-0.1982	3.5742
	100.5	4.0669	-0.2864	3.4989

## Sheet: Figure 6E
	Lipid mixing (%)
	Temperature (°C)	SNV	SNV 50°C	SNV 50°C + 1h 4°C
	0.5	0.0053063	0.0121	-0.033
	1.5	0.4672	0.0513	0.3912
	2.5	0.7444	0.0398	0.6161
	3.5	1.0199	0.0199	0.8111
	4.5	1.2343	0.026	1.0583
	5.5	1.3765	0.0326	1.2115
	6.5	1.6858	-0.0071579	1.4113
	7.5	1.8275	0.0323	1.4832
	8.5	1.9317	0.0074307	1.6778
	9.5	2.131	0.0143	1.8695
	10.5	2.2255	0.0172	1.942
	11.5	2.2761	-0.0070283	2.182
	12.5	2.4905	-0.0187	2.2471
	13.5	2.5365	0.0143	2.3745
	14.5	2.6449	0.0111	2.4723
	15.5	2.8995	-0.0272	2.4677
	16.5	2.8865	0.0125	2.6498
	17.5	2.9728	-0.00072694	2.732
	18.5	3.06	-0.0314	2.9396
	19.5	3.1142	0.0168	2.8515
	20.5	3.1402	0.0216	2.9541
	21.5	3.3164	0.0332	3.1076
	22.5	3.3356	0.0127	3.0093
	23.5	3.4759	-0.0188	3.2293
	24.5	3.5965	0.00746	3.2877
	25.5	3.6181	-0.0255	3.3632
	26.5	3.5534	-0.0638	3.4309
	27.5	3.7686	-0.0161	3.4986
	28.5	3.7516	-0.027	3.5239
	29.5	3.8946	-0.0698	3.675
	30.5	3.8853	-0.0443	3.6515
	31.5	3.8903	-0.0635	3.6331
	32.5	4.1201	-0.0298	3.7608
	33.5	4.0353	-0.0482	3.9395
	34.5	4.109	-0.07	3.9492
	35.5	4.2432	-0.0565	3.8246
	36.5	4.3485	-0.0842	3.9355
	37.5	4.3725	-0.0686	3.95
	38.5	4.3605	-0.0756	4.0366
	39.5	4.4239	-0.012	4.0105
	40.5	4.4549	-0.0356	4.1723
	41.5	4.5733	-0.0723	4.2587
	42.5	4.6127	-0.0317	4.3355
	43.5	4.602	-0.009045	4.3133
	44.5	4.6591	-0.1151	4.2415
	45.5	4.8783	-0.033	4.4276
	46.5	4.8502	-0.0679	4.5475
	47.5	4.9381	-0.0326	4.445
	48.5	4.9695	-0.0521	4.5932
	49.5	5.0126	-0.0737	4.5806
	50.5	4.9932	-0.0745	4.4896
	51.5	5.1456	-0.1222	4.6526
	52.5	5.1219	-0.0901	4.6696
	53.5	5.0966	-0.0639	4.7222
	54.5	5.1915	-0.0793	4.878
	55.5	5.3329	-0.1004	4.7768
	56.5	5.3658	-0.1034	4.8462
	57.5	5.3499	-0.1179	4.9622
	58.5	5.3916	-0.1051	4.7809
	59.5	5.3917	-0.0891	4.9736
	60.5	5.5008	-0.0667	4.982
	61.5	5.4432	-0.0892	4.8775
	62.5	5.5036	-0.1081	5.0118
	63.5	5.4505	-0.1133	5.0853
	64.5	5.67	-0.0906	5.0866
	65.5	5.6707	-0.0747	5.1046
	66.5	5.6967	-0.111	5.2029
	67.5	5.7098	-0.1441	5.317
	68.5	5.8066	-0.0943	5.2191
	69.5	5.8574	-0.0873	5.3474
	70.5	5.8563	-0.1176	5.3548
	71.5	5.9059	-0.1379	5.303
	72.5	5.9357	-0.1628	5.3905
	73.5	5.8918	-0.157	5.4215
	74.5	5.9285	-0.128	5.3101
	75.5	6.1429	-0.194	5.5672
	76.5	5.9653	-0.1188	5.515
	77.5	6.1008	-0.1153	5.439
	78.5	6.0201	-0.1496	5.5764
	79.5	6.0903	-0.1389	5.535
	80.5	5.9863	-0.2001	5.6114
	81.5	6.1809	-0.1807	5.6568
	82.5	6.2166	-0.1785	5.6112
	83.5	6.1466	-0.2039	5.5384
	84.5	6.2842	-0.2031	5.7624
	85.5	6.209	-0.2039	5.6728
	86.5	6.1116	-0.1708	5.715
	87.5	6.2302	-0.1891	5.7827
	88.5	6.2432	-0.18	5.807
	89.5	6.3404	-0.2138	5.8976
	90.5	6.4295	-0.2211	5.772
	91.5	6.2456	-0.1799	5.8408
	92.5	6.3247	-0.1976	5.8545
	93.5	6.2394	-0.2154	5.9836
	94.5	6.2436	-0.2075	5.9701
	95.5	6.4057	-0.2286	5.8544
	96.5	6.4717	-0.249	6.0462
	97.5	6.5845	-0.1824	6.1168
	98.5	6.569	-0.2021	6.1311
	99.5	6.4387	-0.2392	6.0629
	100.5	6.5767	-0.198	6.0914
