# Supplementary figures and images for: Molecular organization and dynamics of the fusion protein Gc at the hantavirus surface
Source: eLife journal article supplement (doi:10.7554/elife.46028), 2019-06-10

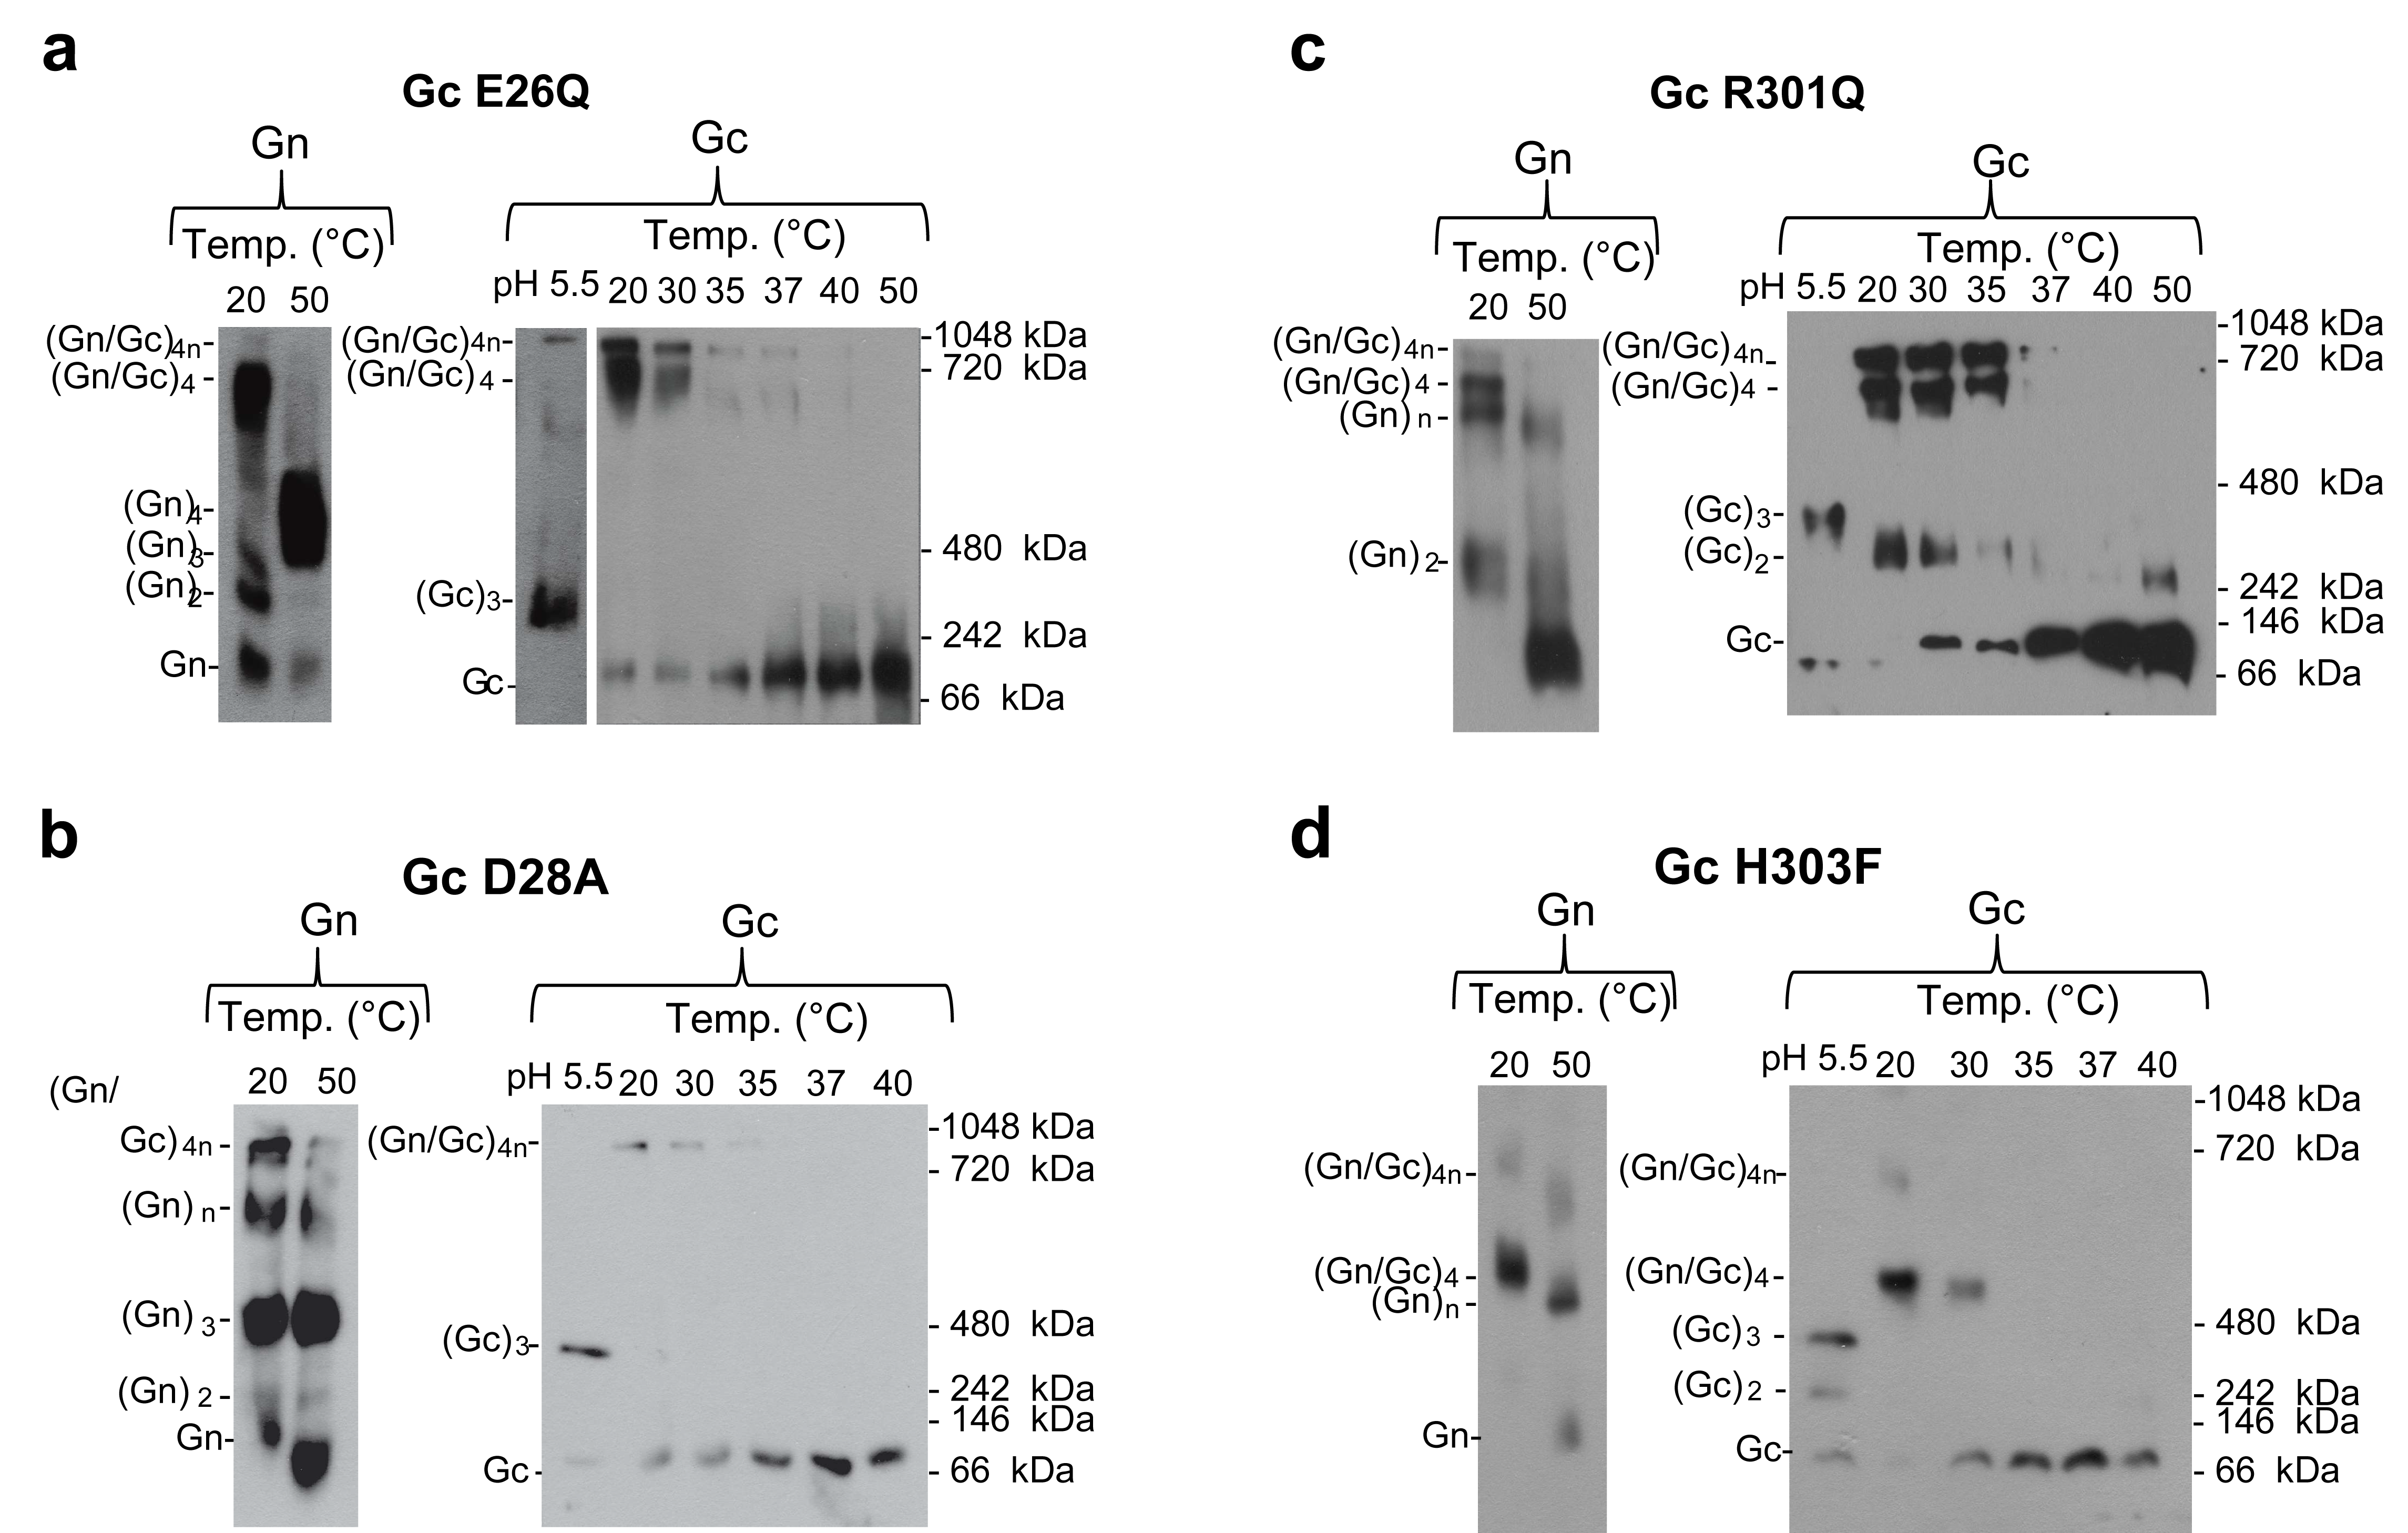

Supplement: supp [file elife-46028-supp-v1.zip › elife_poa_e46028_Figure_3_figure_supplement_2.tif]

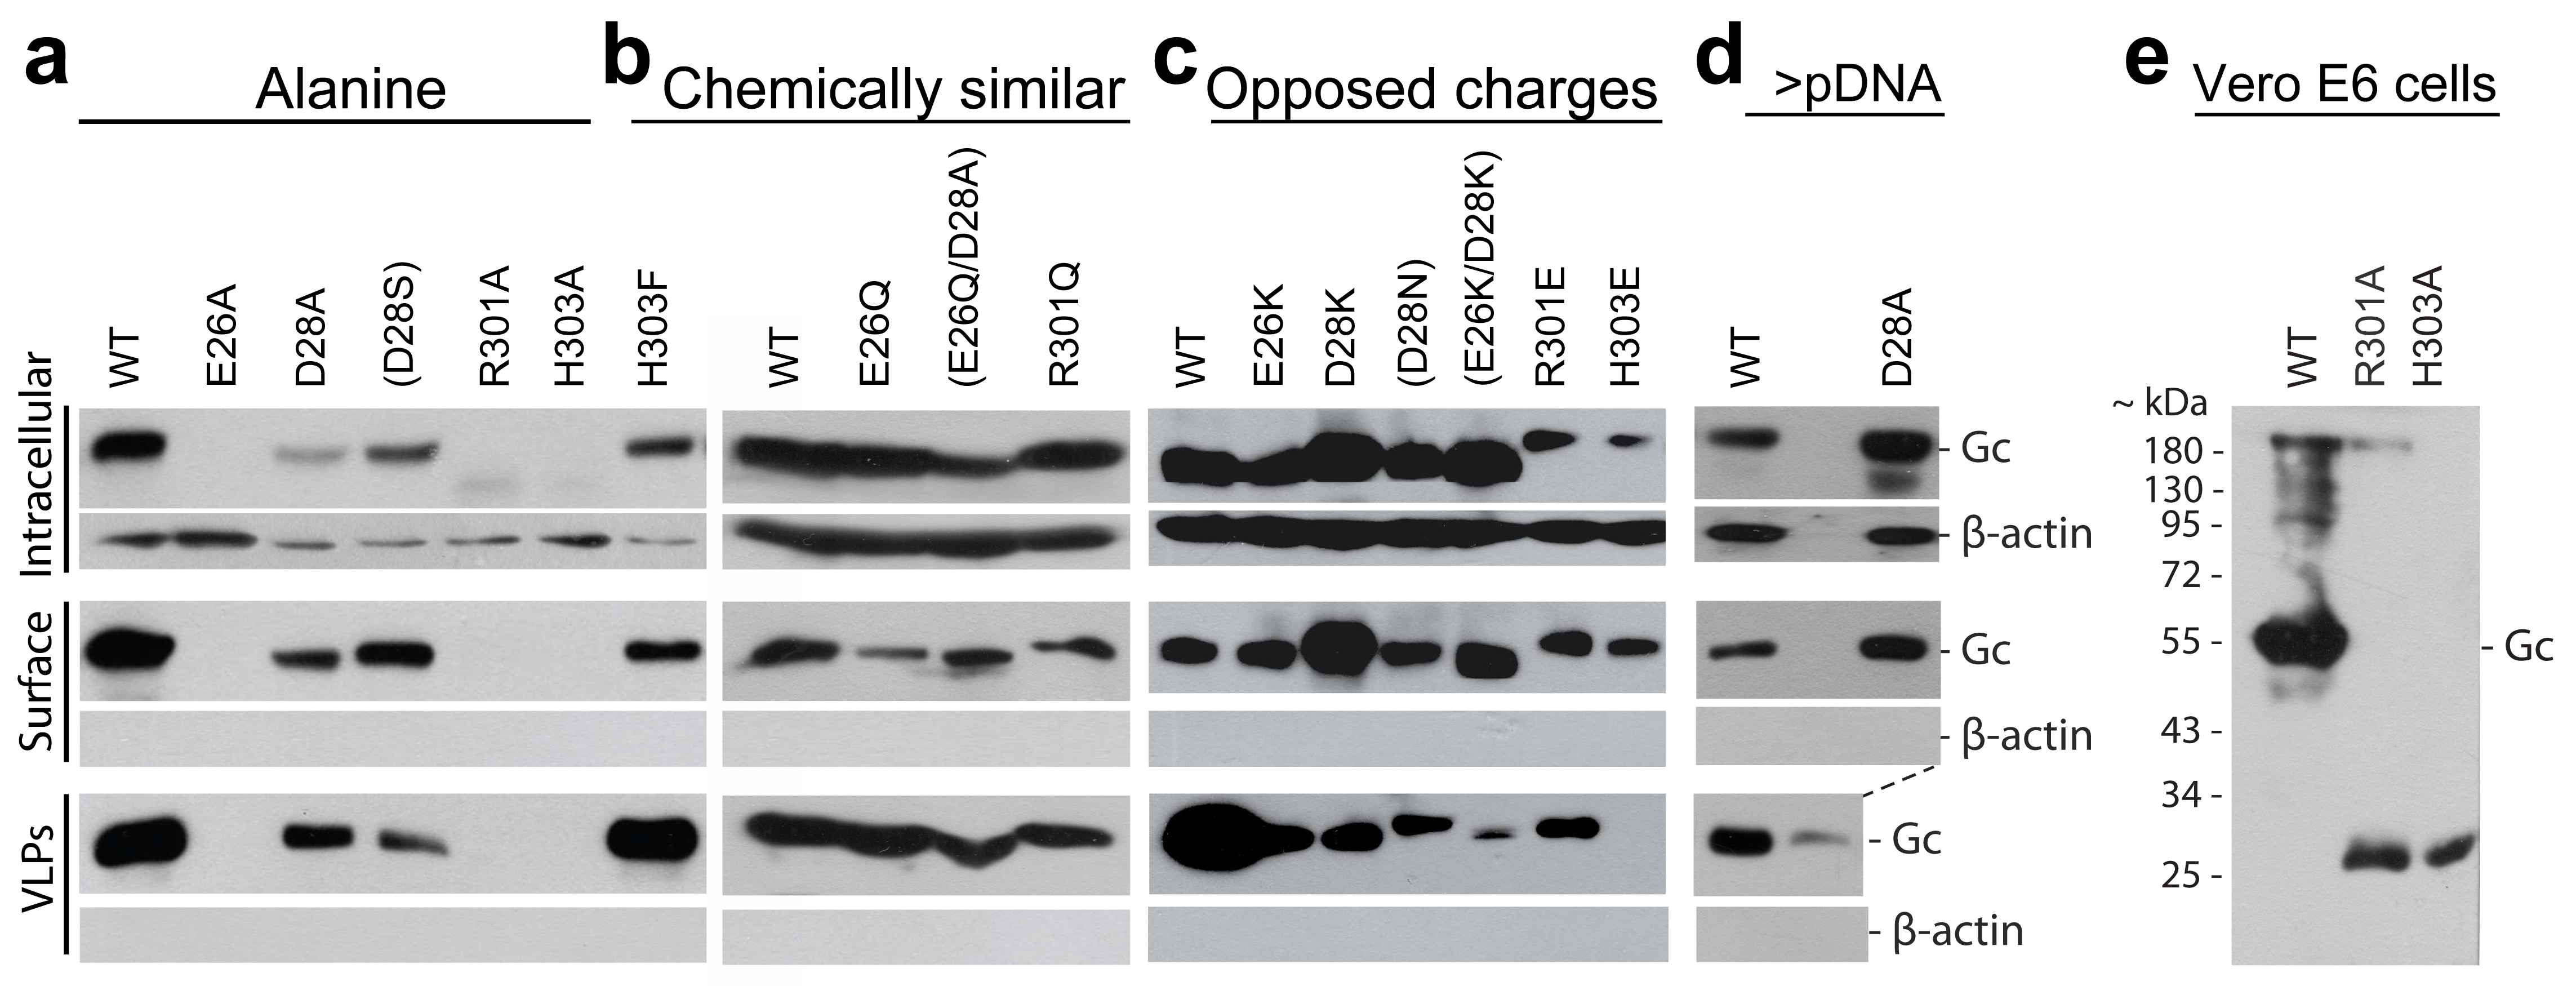

Supplement: supp [file elife-46028-supp-v1.zip › elife_poa_e46028_Figure_3_figure_supplement_1.tif]

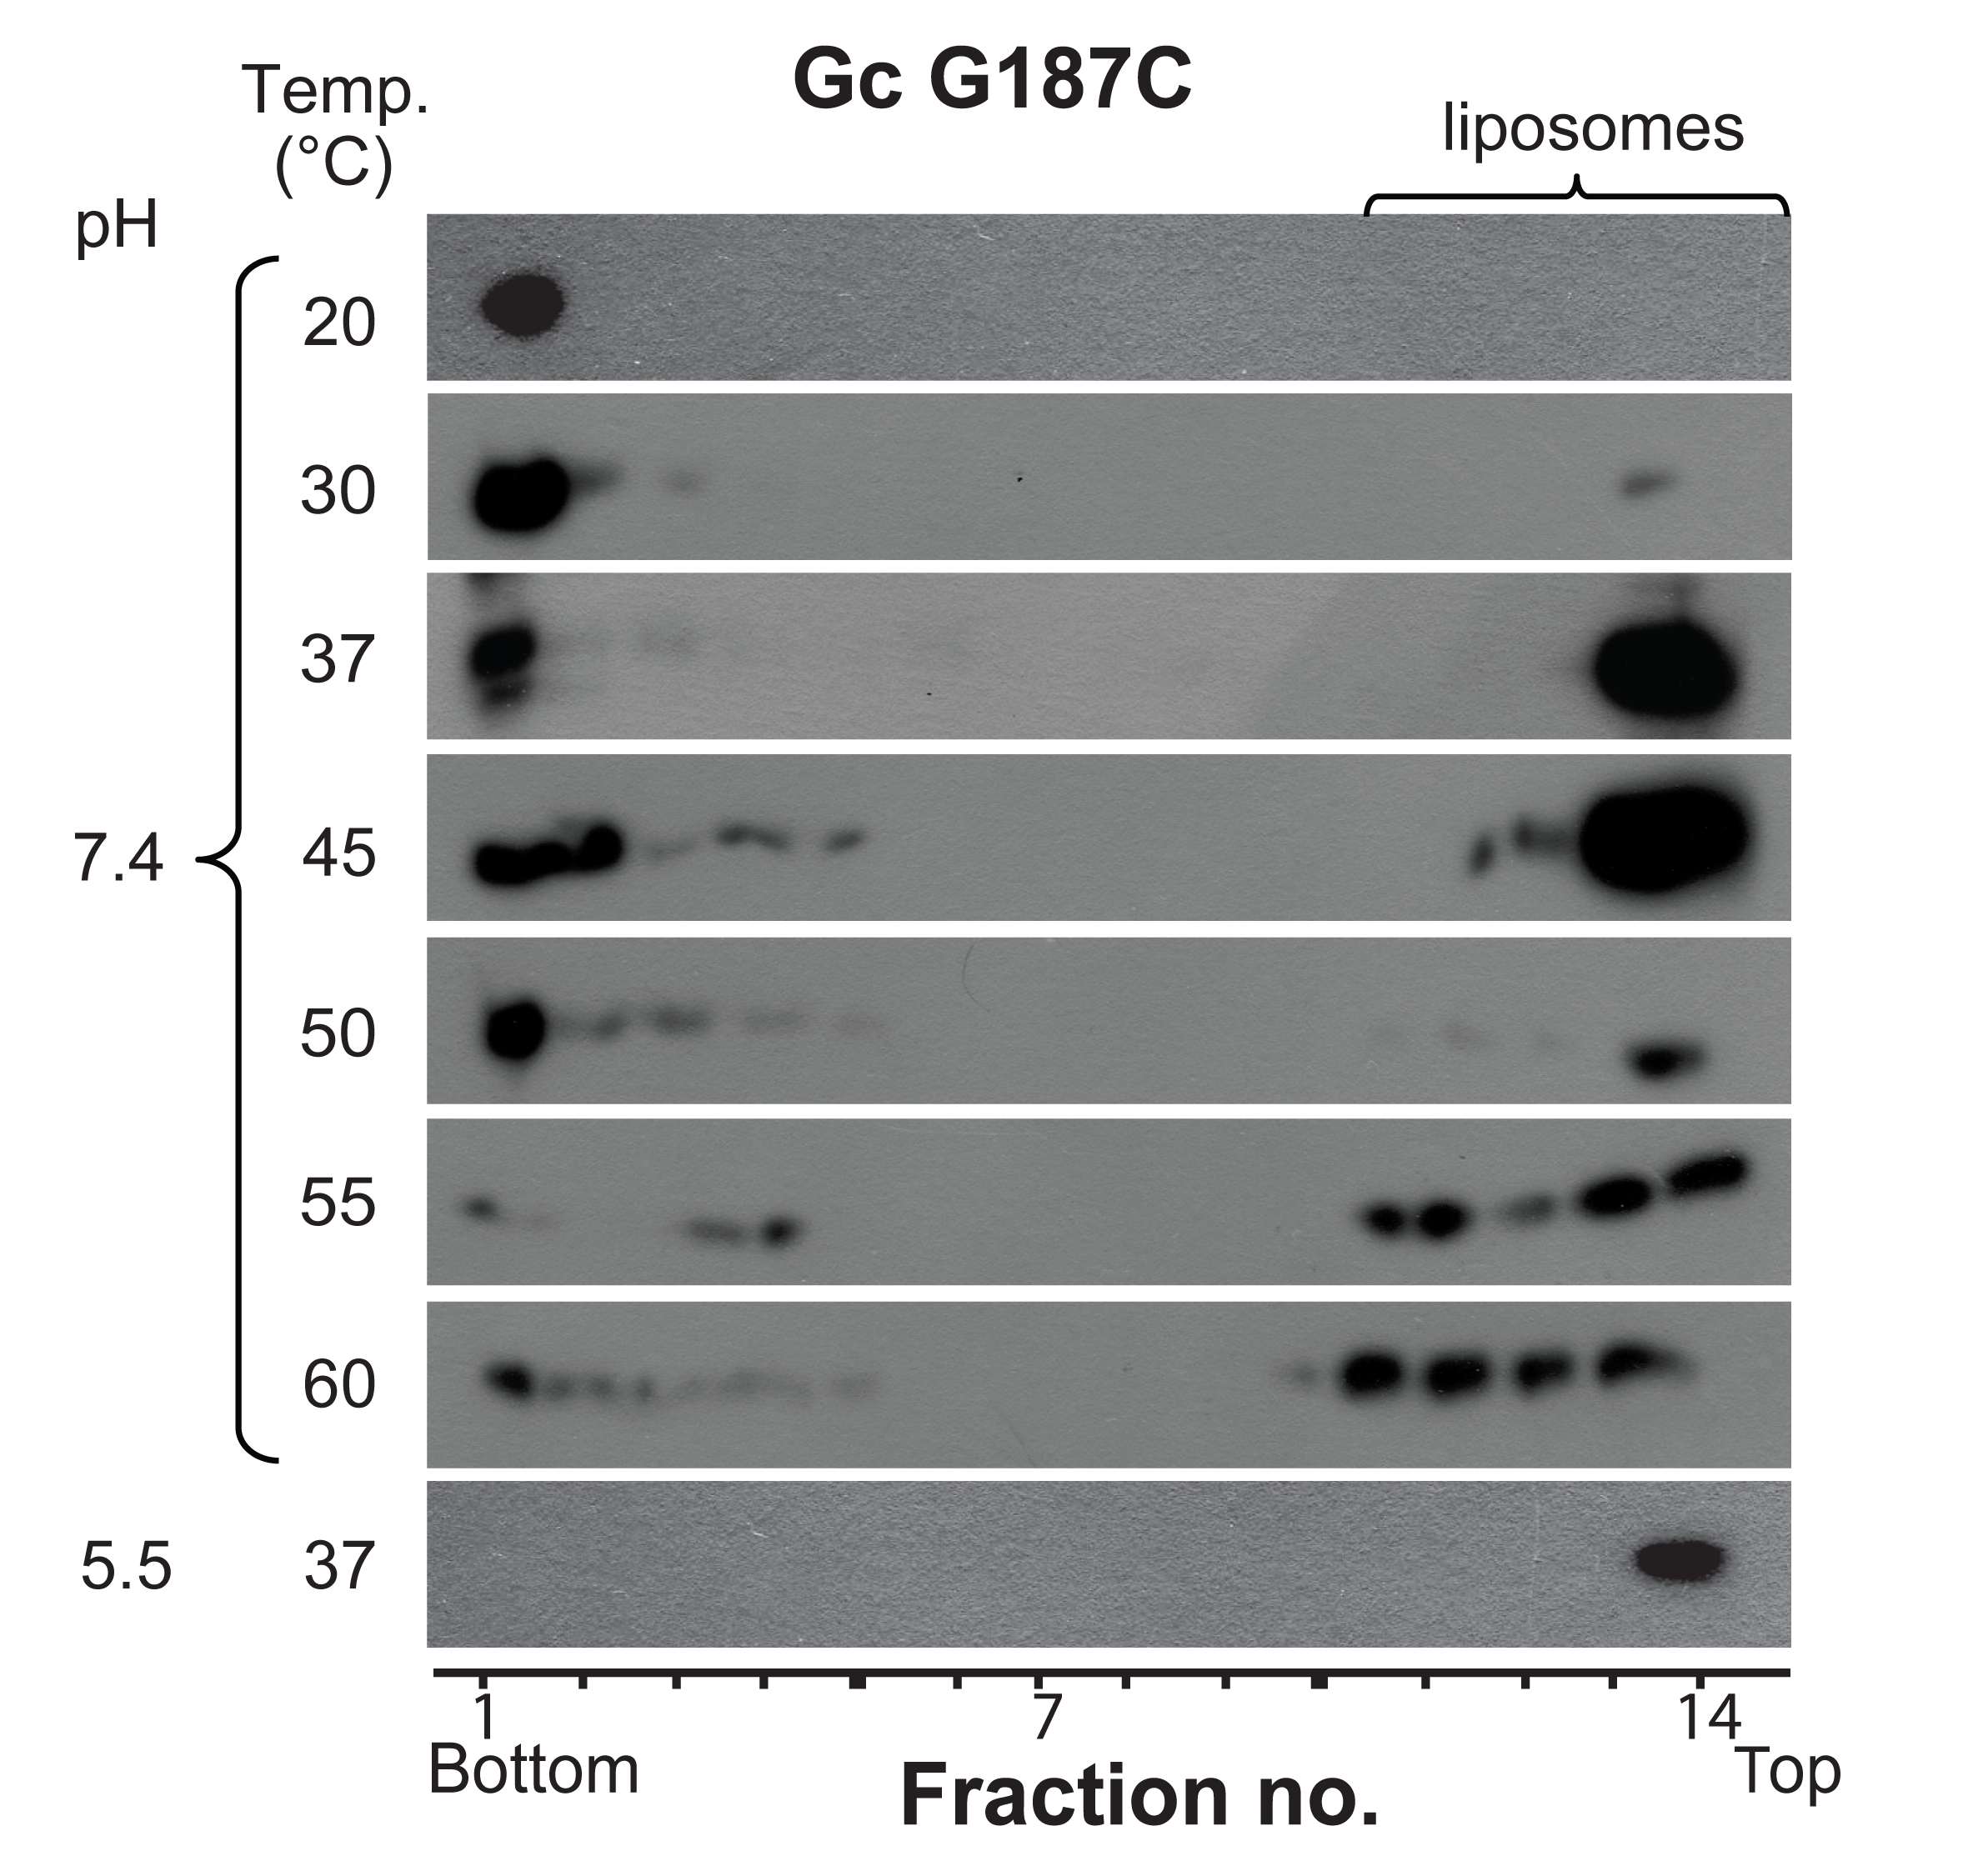

Supplement: supp [file elife-46028-supp-v1.zip › elife_poa_e46028_Figure_5_figure_supplement_1.tif]

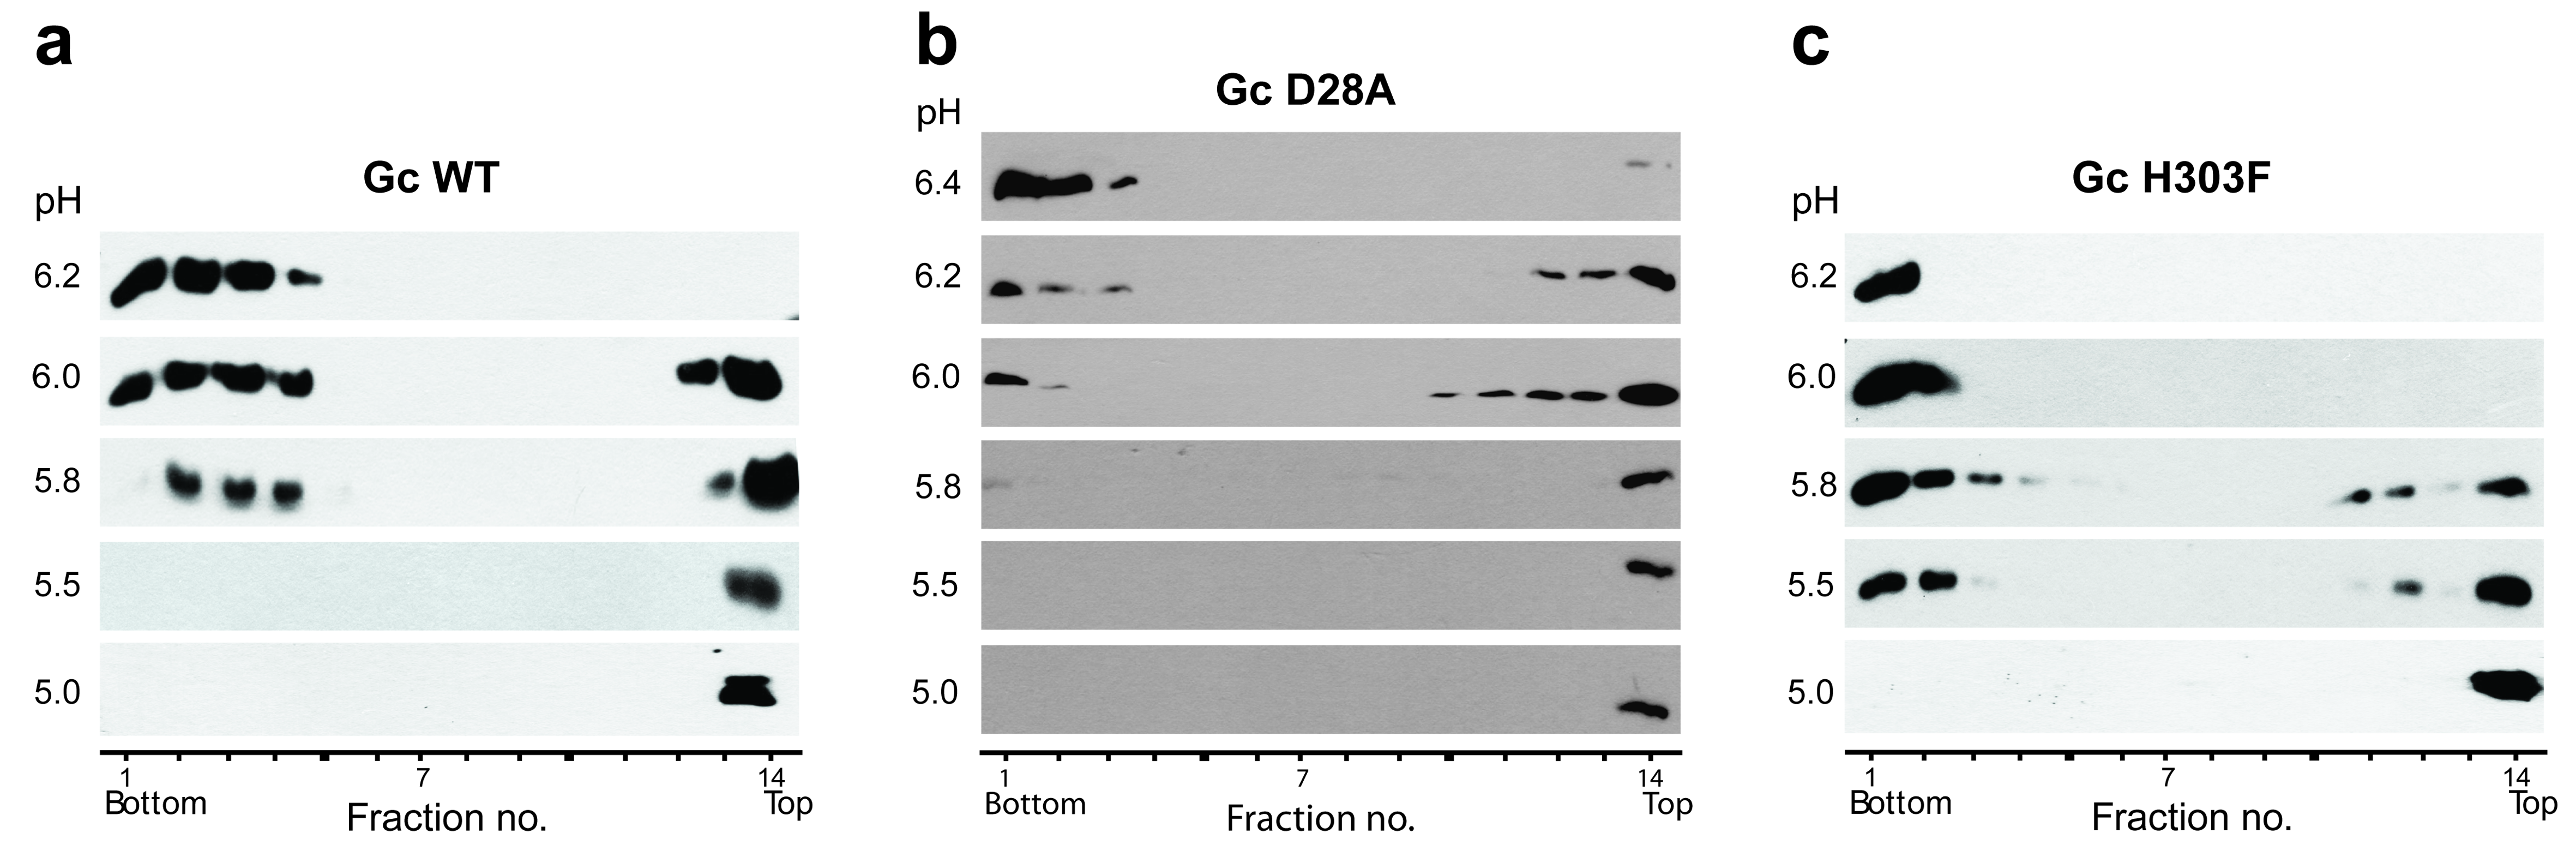

Supplement: supp [file elife-46028-supp-v1.zip › elife_poa_e46028_Figure_4_figure_supplement_1.tif]

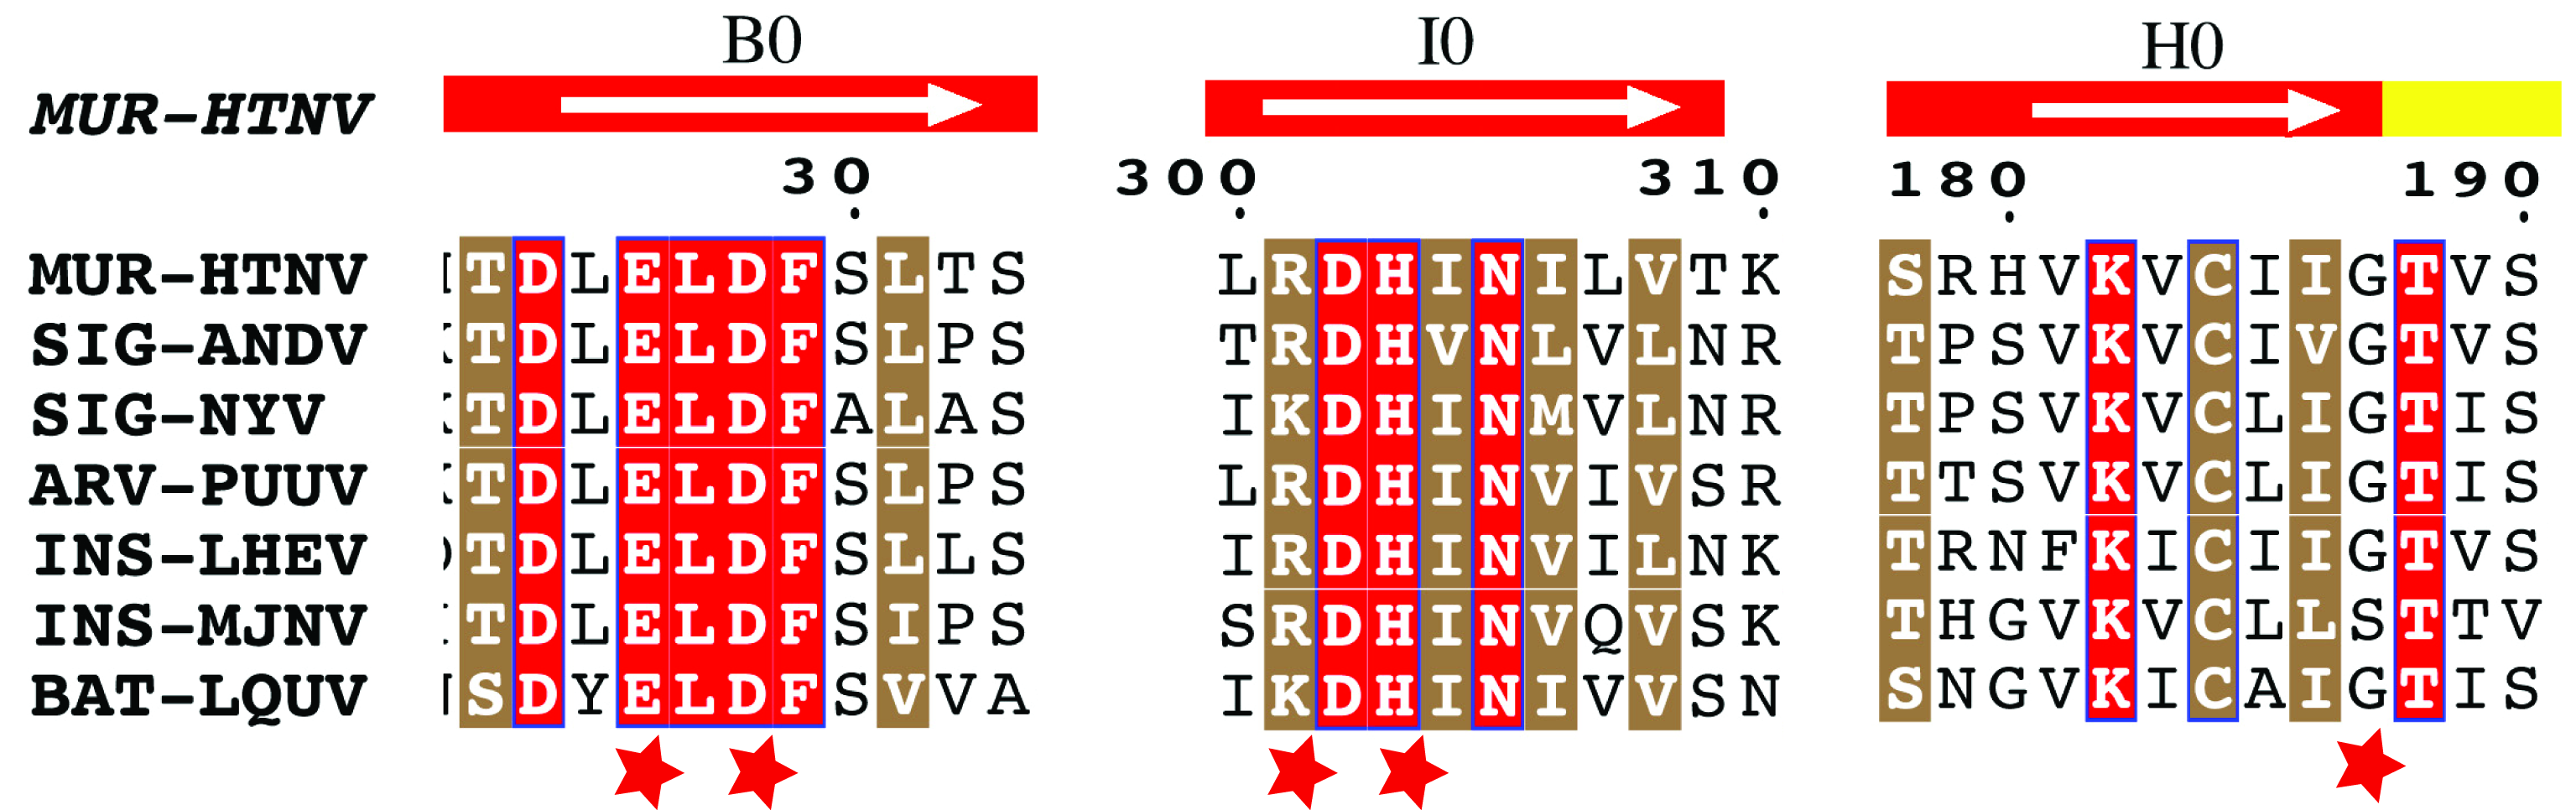

Supplement: supp [file elife-46028-supp-v1.zip › elife_poa_e46028_Figure_1_figure_supplement_1.tif]
